# Supplementary material
Source: PubMed Central journal article supplement (PMC2563115)
Supplement: 0808352105_0808352105SI.pdf [file 0808352105_0808352105SI.pdf]

# Supporting Information

Ruiz 10.1073/pnas.0808352105

Table S1. IM proteins conserved in *E. coli*, *Bl. floridanus*, and *B. aphidicola* str. APS

| Protein     | Function*                                                      | Essential in <i>E. coli</i> <sup>†</sup> |
|-------------|----------------------------------------------------------------|------------------------------------------|
| AtpB        | ATPase subunit                                                 | No                                       |
| AtpE        | ATPase subunit                                                 | No                                       |
| AtpF        | ATPase subunit                                                 | No                                       |
| Cls         | Phospholipid biosynthesis                                      | No                                       |
| CyoA        | Ubiquinol oxidase subunit                                      | No                                       |
| CyoB        | Ubiquinol oxidase subunit                                      | No                                       |
| CyoC        | Ubiquinol oxidase subunit                                      | No                                       |
| CyoD        | Ubiquinol oxidase subunit                                      | No                                       |
| CyoE        | Ubiquinol oxidase subunit                                      | No                                       |
| FtsH        | Protease                                                       | Yes                                      |
| FtsI        | Septal peptidoglycan biosynthesis                              | Yes                                      |
| FtsL        | Cell division                                                  | Yes                                      |
| FtsW        | Cell division protein; recruits FtsI to the cell division site | Yes                                      |
| HflK        | HflK-HflC membrane protein complex, regulator of FtsH          | No                                       |
| HflK        | HflK-HflC membrane protein complex, regulator of FtsH          | No                                       |
| LepB        | Signal peptidase                                               | Yes                                      |
| Lgt         | Lipoprotein biogenesis                                         | Yes                                      |
| LoIC        | Lipoprotein transport                                          | Yes                                      |
| LspA        | Lipoprotein biogenesis                                         | Yes                                      |
| MraY        | Peptidoglycan biosynthesis                                     | Yes                                      |
| MrcB        | Peptidoglycan biosynthesis                                     | No                                       |
| MviN (MurJ) | Unknown                                                        | Yes                                      |
| NuoA        | NADH-ubiquinone oxidoreductase subunit                         | No                                       |
| NuoH        | NADH-ubiquinone oxidoreductase subunit                         | No                                       |
| NuoJ        | NADH-ubiquinone oxidoreductase subunit                         | No                                       |
| NuoK        | NADH-ubiquinone oxidoreductase subunit                         | No                                       |
| NuoL        | NADH-ubiquinone oxidoreductase subunit                         | No                                       |
| NuoM        | NADH-ubiquinone oxidoreductase subunit                         | No                                       |
| NuoN        | NADH-ubiquinone oxidoreductase subunit                         | No                                       |
| PitA        | Phosphate transporter                                          | No                                       |
| SecE        | Protein transport across and insertion into IM                 | Yes                                      |
| SecY        | Protein transport across and insertion into IM                 | Yes                                      |
| YajC        | Protein transport across and insertion into IM                 | No                                       |
| YajR        | Unknown; major facilitator superfamily                         | No                                       |
| YhgN        | Unknown; predicted transporter (MarC family)                   | No                                       |
| YibN        | Unknown; predicted rhodanese-related sulfurtransferase         | No                                       |
| YidC        | IM protein insertion                                           | Yes                                      |
| YoaE        | Unknown; predicted transporter (TerC family)                   | No                                       |
| YtfN        | Unknown                                                        | No                                       |

\*Functions according to EcoCyc and EcoGene (1, 2).

<sup>†</sup>According to Baba *et al.* (3).

1. Karp PD, Riley M, Paley SM, Pellegrini-Toole A, Krummenacker M (1999) Eco Cyc: Encyclopedia of *Escherichia coli* genes and metabolism. *Nucleic Acids Res* 27:55–58.
2. Rudd KE (2000) EcoGene: A genome sequence database for *Escherichia coli* K-12. *Nucleic Acids Res* 28:60–64.
3. Baba T, *et al.* (2006) Construction of *Escherichia coli* K-12 in-frame, single-gene knockout mutants: The Keio collection. *Mol Syst Biol* 2:2006 0008.

**Table S2. STRING prediction of functional partners**

| Protein | Predicted functional partners*              | Predicted topology† |
|---------|---------------------------------------------|---------------------|
| MurJ    | RodA, MurCDEZ, PbpA, FtsW, AmiC, NudH, GlmU | Integral            |
| YajR    | OxaA, PpdA, YjbD, PpnK                      | Integral            |
| YhgN    | None                                        | Integral            |
| YibN    | PapD, HolA, GlpE, GrxC                      | Membrane-anchored   |
| YoaE    | None                                        | Integral            |
| YtfN    | YtfM, MukEF, LolB, LptCD, SprT, YjaG, YajG  | Membrane-anchored   |

\*Using gene fusion, cooccurrence, textmining, and coexpression as prediction methods in STRING (1).

†Assigned by EchoLOCATION (2).

1. von Mering C, et al. (2007) STRING 7—Recent developments in the integration and prediction of protein interactions. *Nucleic Acids Res* 35:D358–D362.
2. Misra RV, Horler RS, Reindl W, Goryanin II, Thomas GH (2005) EchoBASE: An integrated post-genomic database for *Escherichia coli*. *Nucleic Acids Res* 33:D329–D333.
